# Supplementary material for: Modulation of the thermal conductivity, interlayer thermal resistance, and interfacial thermal conductance of C2N
Source: Royal Society of Chemistry journal article supplement (doi:10.1039/d1cp05574g), 2022-01-01
Supplement: d1cp05574g2.pdf [file d1cp05574g2.pdf]

# Supplementary Information for “Modulation of thermal conductivity, interlayer thermal resistance, and interfacial thermal conductance of C<sub>2</sub>N”

Jieren Song<sup>\*a</sup>, Xingang Liang<sup>a</sup>, Zhonghai Xu<sup>\*b</sup>, Xiaodong He<sup>b</sup>

<sup>a</sup> Key Laboratory for Thermal Science and Power Engineering of Ministry of Education, Department of Engineering Mechanics, Tsinghua University, Beijing 100084, China

<sup>b</sup> National Key Laboratory of Science and Technology on Advanced Composites in Special Environments, Harbin Institute of Technology, Harbin 150080, China.

## S1. Phonon dispersion of C<sub>2</sub>N

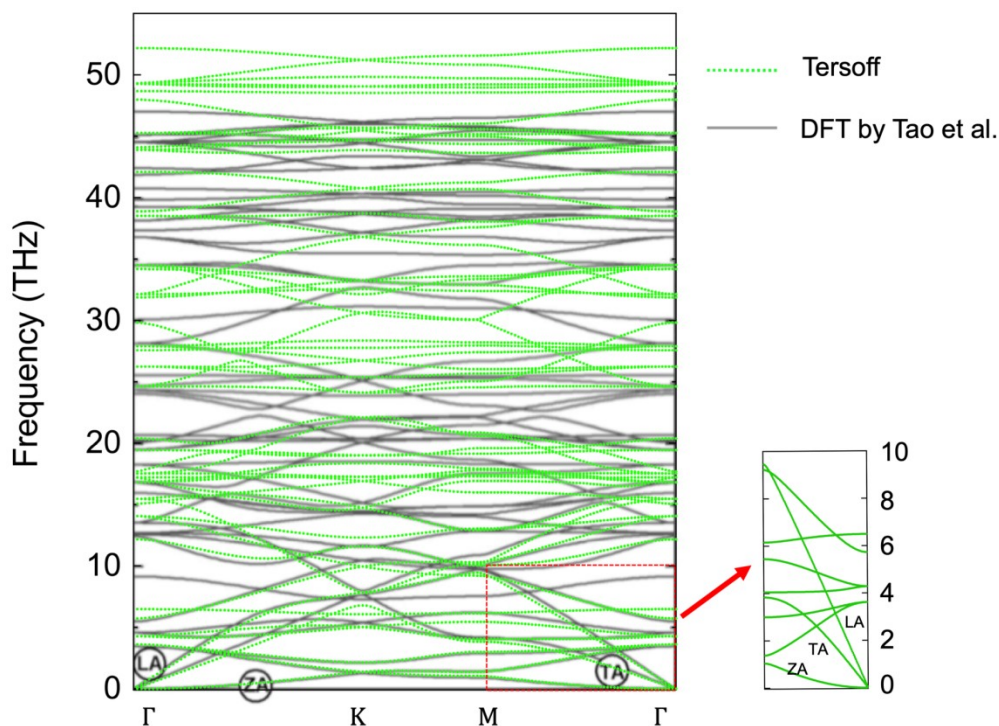

Fig.S1. Phonon dispersion of C<sub>2</sub>N

Three acoustic branches, including the longitudinal acoustic (LA), transverse acoustic (TA), and out-of-plane acoustic (ZA) phonon mode are in agreement with the DFT results of Tao et al. As shown in the inset of Fig.S1, near the  $\Gamma$  point in the center of the Brillouin zone, the LA and TA modes are linearly distributed, while the ZA mode is quadratically distributed, similar to graphene.

## S2. Temperature distribution in the C<sub>2</sub>N/C-C<sub>2</sub>N heterostructure

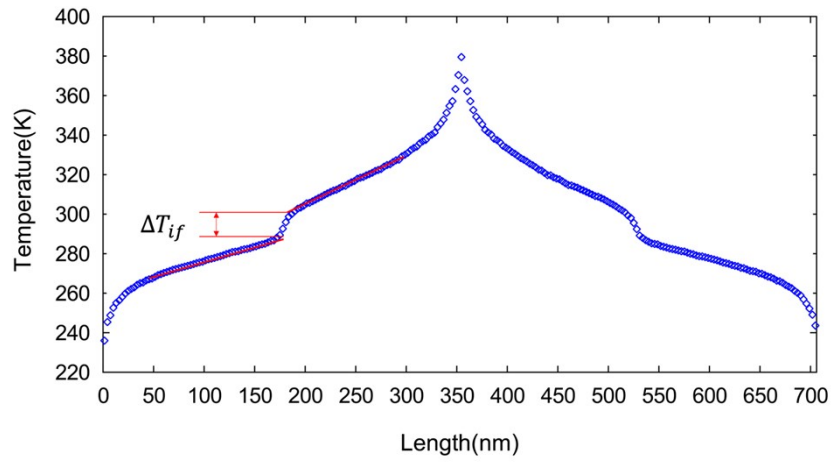

Fig. S2. Temperature distribution in the  $C_2N/C-C_2N$  heterostructure along the heat flux direction.

### S3. Width effects on $k_i$

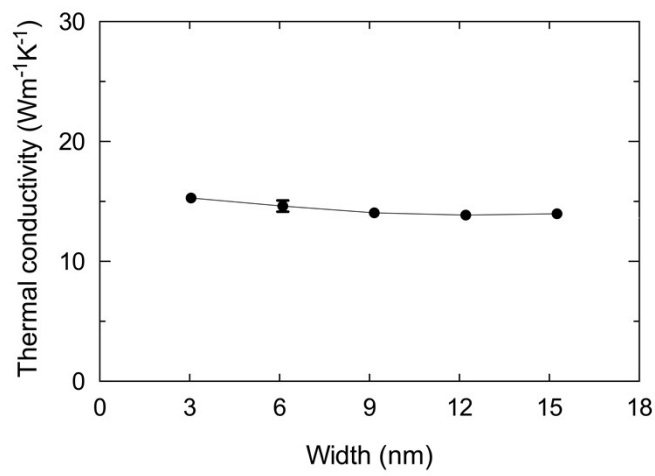

Fig.S3. The influence of model widths ranging from 3 to 15 nm on  $k_i$

### S4. Primitive cell of $C_2N$

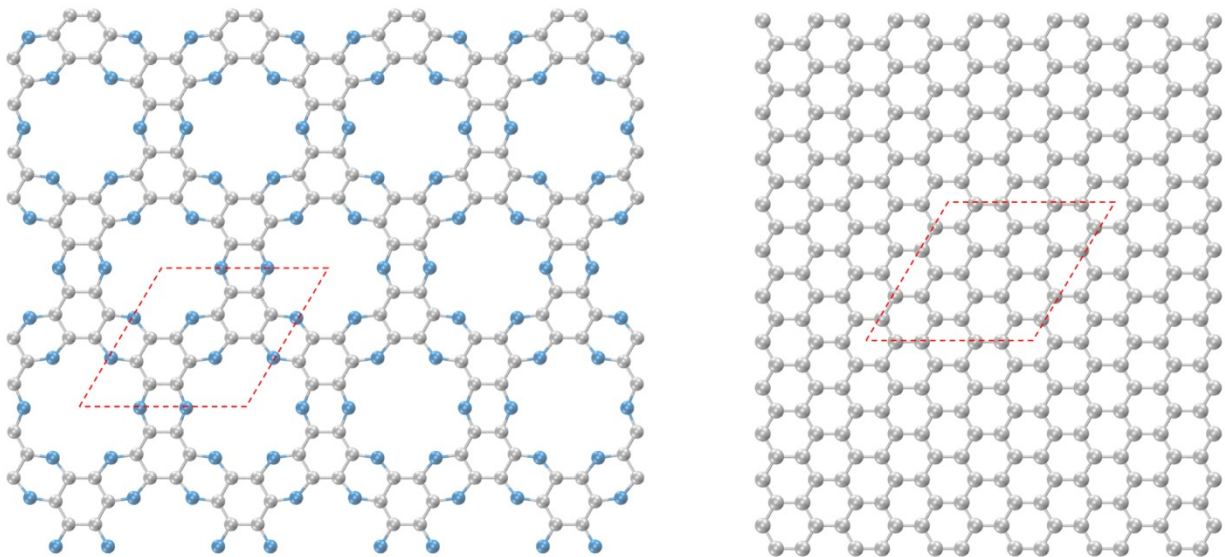

Fig.S4. Atomic structure of graphene and  $C_2N$ . The 18-atoms unit cell of  $C_2N$  and the 24-atoms unit cell of graphene are shown.

### S5. Geometric optimization of models for C and N atomic defects

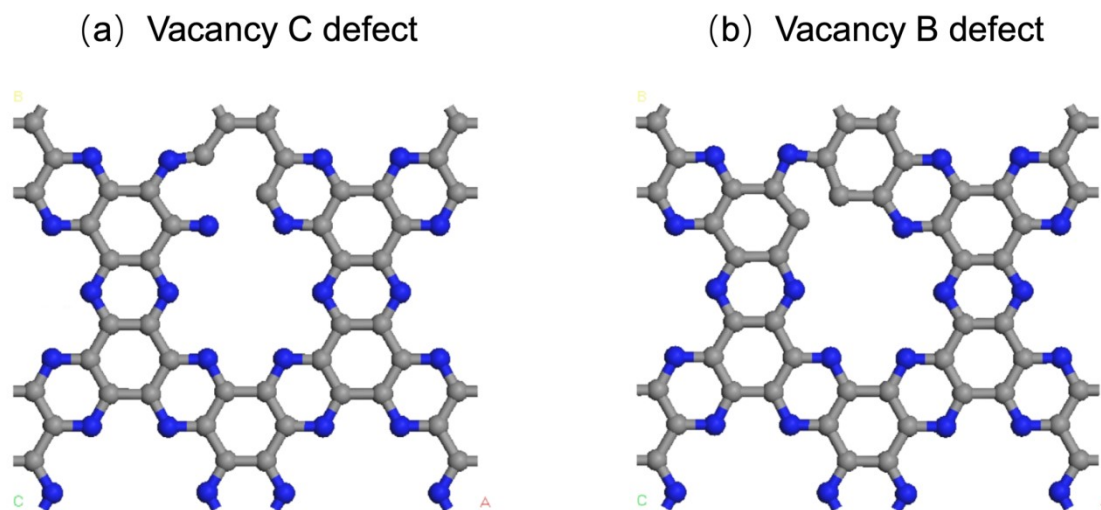

Fig.S5. Geometric optimization of  $C_2N$  with C and N defects.

DFT calculations are performed as implemented in CASTEP using the Perdew-Burke-Enzerhof generalized gradient approximation exchange-correlation functional. The energy cutoff is 400 eV.

### S6. Stress-strain curve

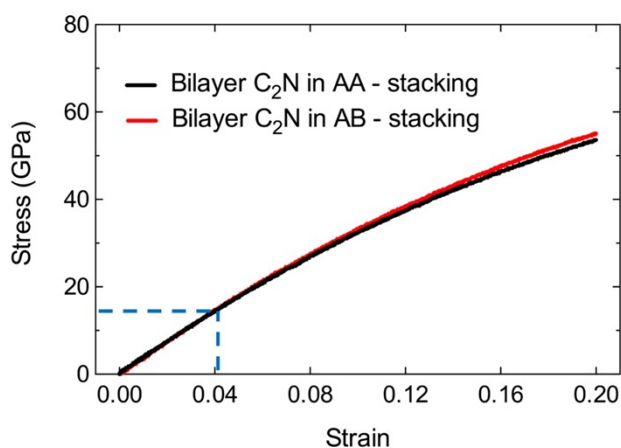

Fig. S6. Engineering stress-strain response of bilayer  $C_2N$  in AA- and AB- stacking.

### S7. Stress distributions of $C_2N/C-C_2N$ heterostructures

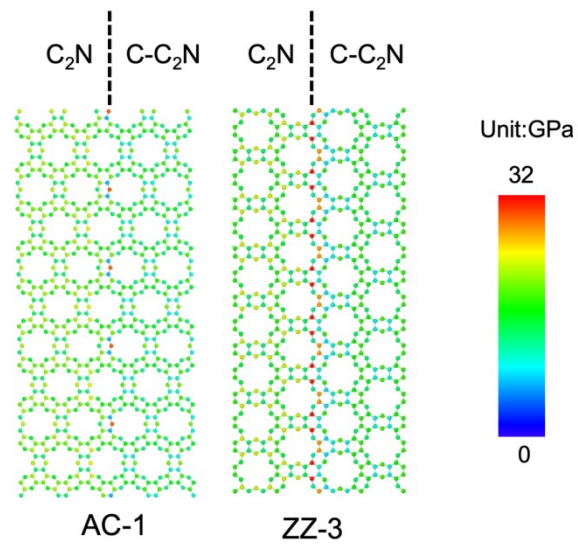

Fig. S7. Stress distributions of C<sub>2</sub>N/C-C<sub>2</sub>N heterostructures at the AC-1 and ZZ-3 interfaces.
